# Supplementary material
Source: MDPI journal article supplement (https://www.mdpi.com/2571-6131/7/2/40)
Supplement: s1 [file s1 › ceramics-2896704-supplementary.pdf]

# Enhancing transparency in non-cubic calcium phosphate ceramics: effect of starting powder, LiF doping, and SPS sintering parameters

K.A.Prokop<sup>1,2</sup>, S. Cottrino<sup>3</sup>, V. Garnier<sup>3</sup>, G. Fantozzi<sup>3</sup>, Y. Guyot<sup>4</sup>, G. Boulon<sup>4</sup>, M. Guzik<sup>1,2,\*</sup>

<sup>1</sup> University of Wrocław, Faculty of Chemistry, ul. F. Joliot-Curie 14, 50-383 Wrocław, Poland

<sup>2</sup> Łukasiewicz Research Network - PORT Polish Center for Technology Development, ul. 147 Stabłowicka, 54-066 Wrocław, Poland

<sup>3</sup> INSA Lyon, Université Claude Bernard Lyon 1, CNRS, MATEIS, UMR5510, 69621 Villeurbanne, France

<sup>4</sup> Univ Lyon, Institute Light Matter (iLM), UMR 5306 CNRS-Claude Bernard/Lyon1 University, 69622 Villeurbanne, France

\* Correspondence: e-mail@e-mail.com; Tel.: [goguzik@poczta.fm](mailto:goguzik@poczta.fm), +48 71 37 51 373 (M.G.)

---

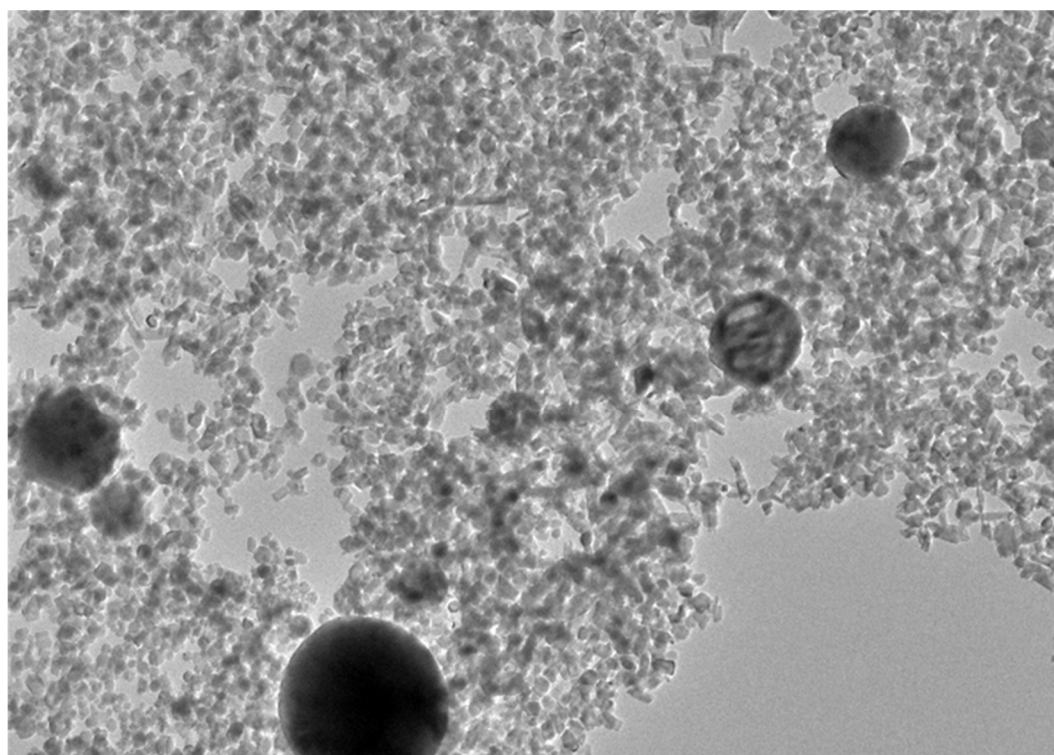

500  $\mu\text{m}$

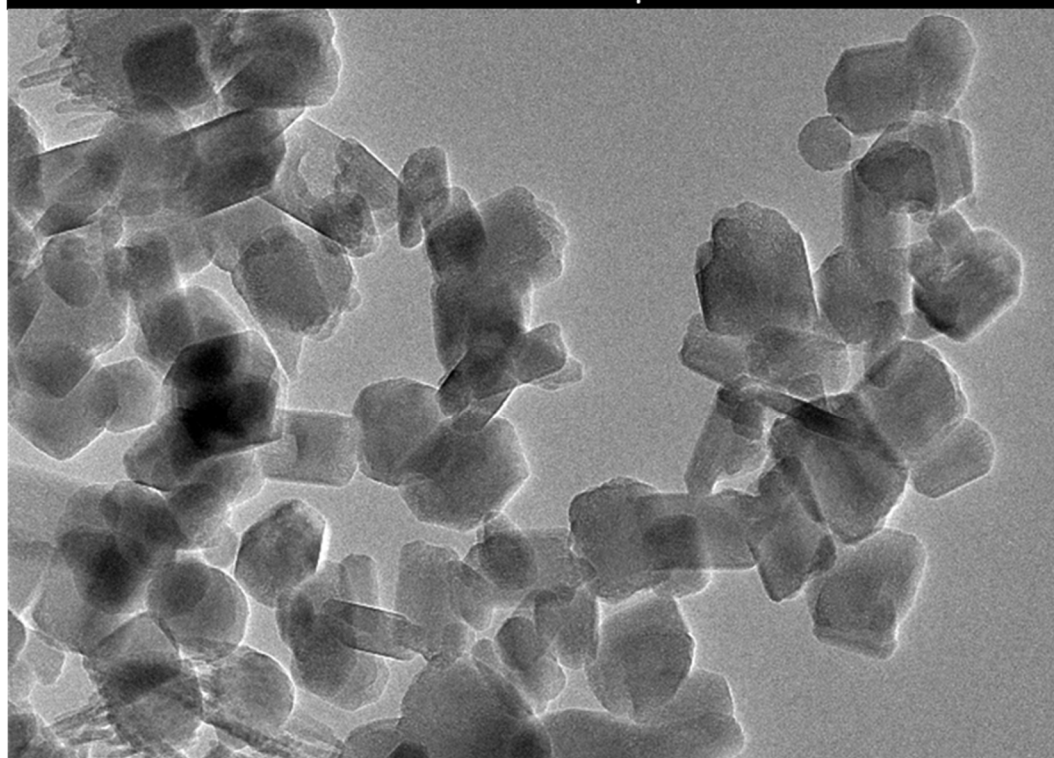

100  $\mu\text{m}$

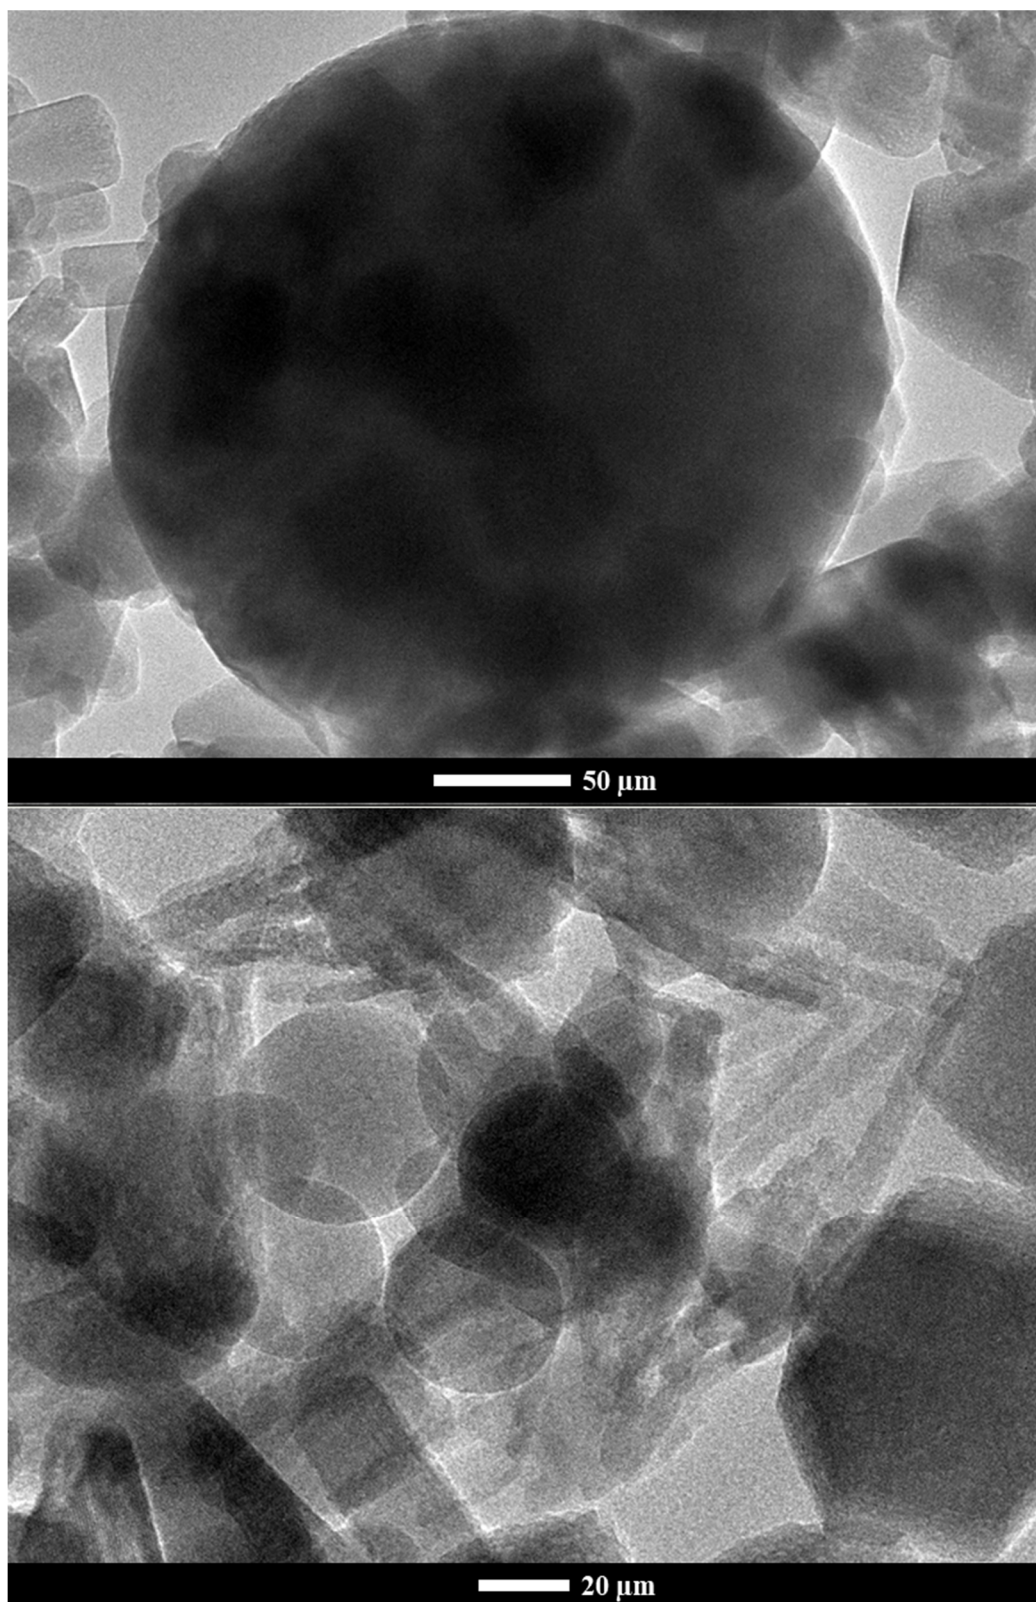

**Figure S1.** TEM micrographs of COM. HA, nano-crystalline calcium phosphates.

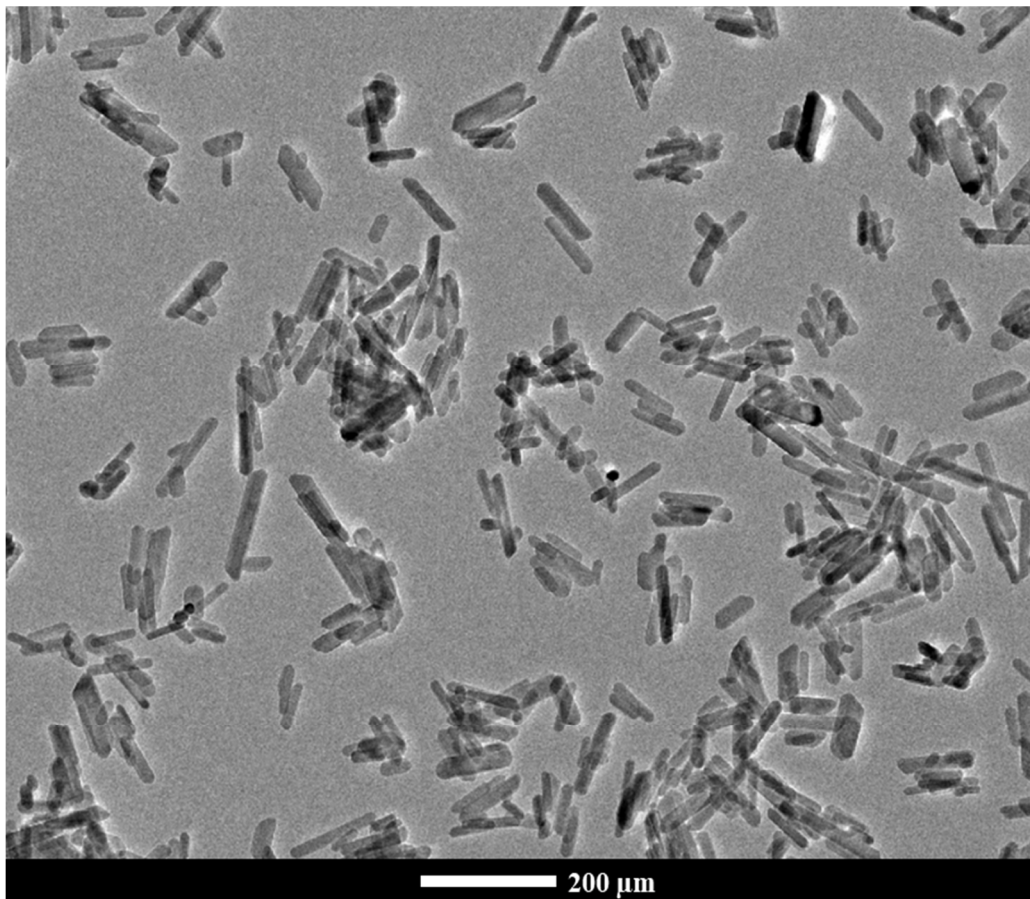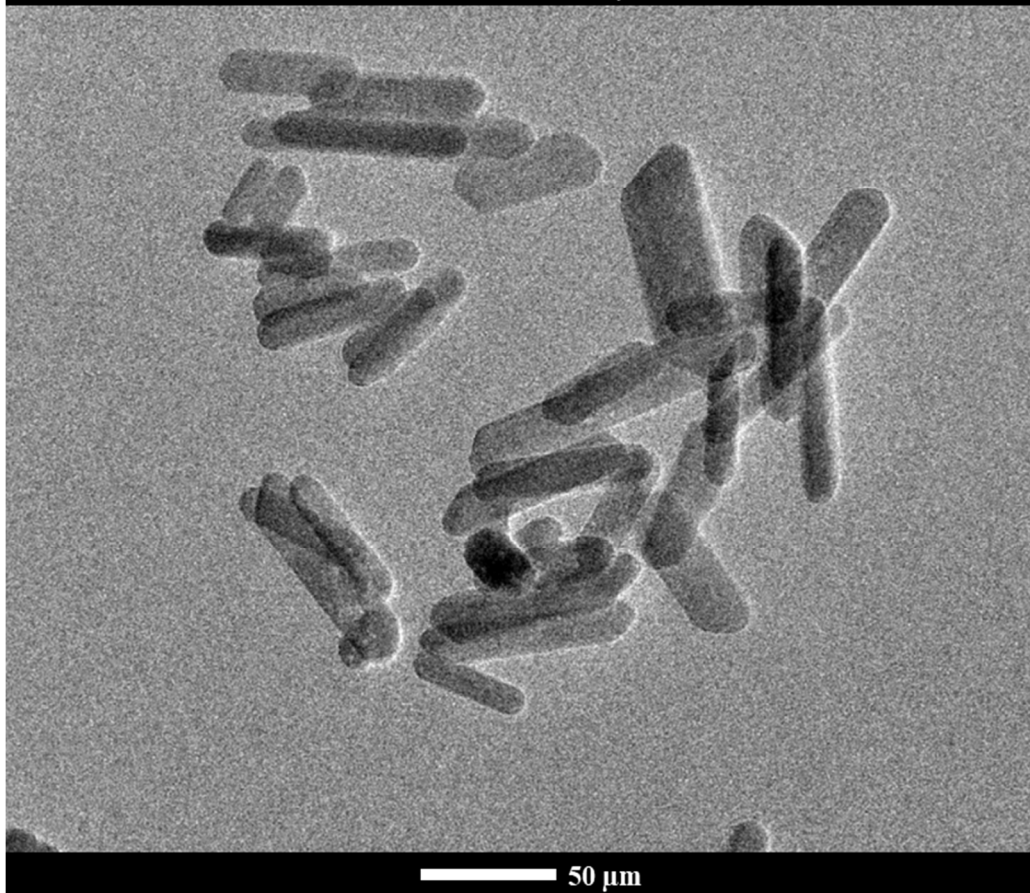

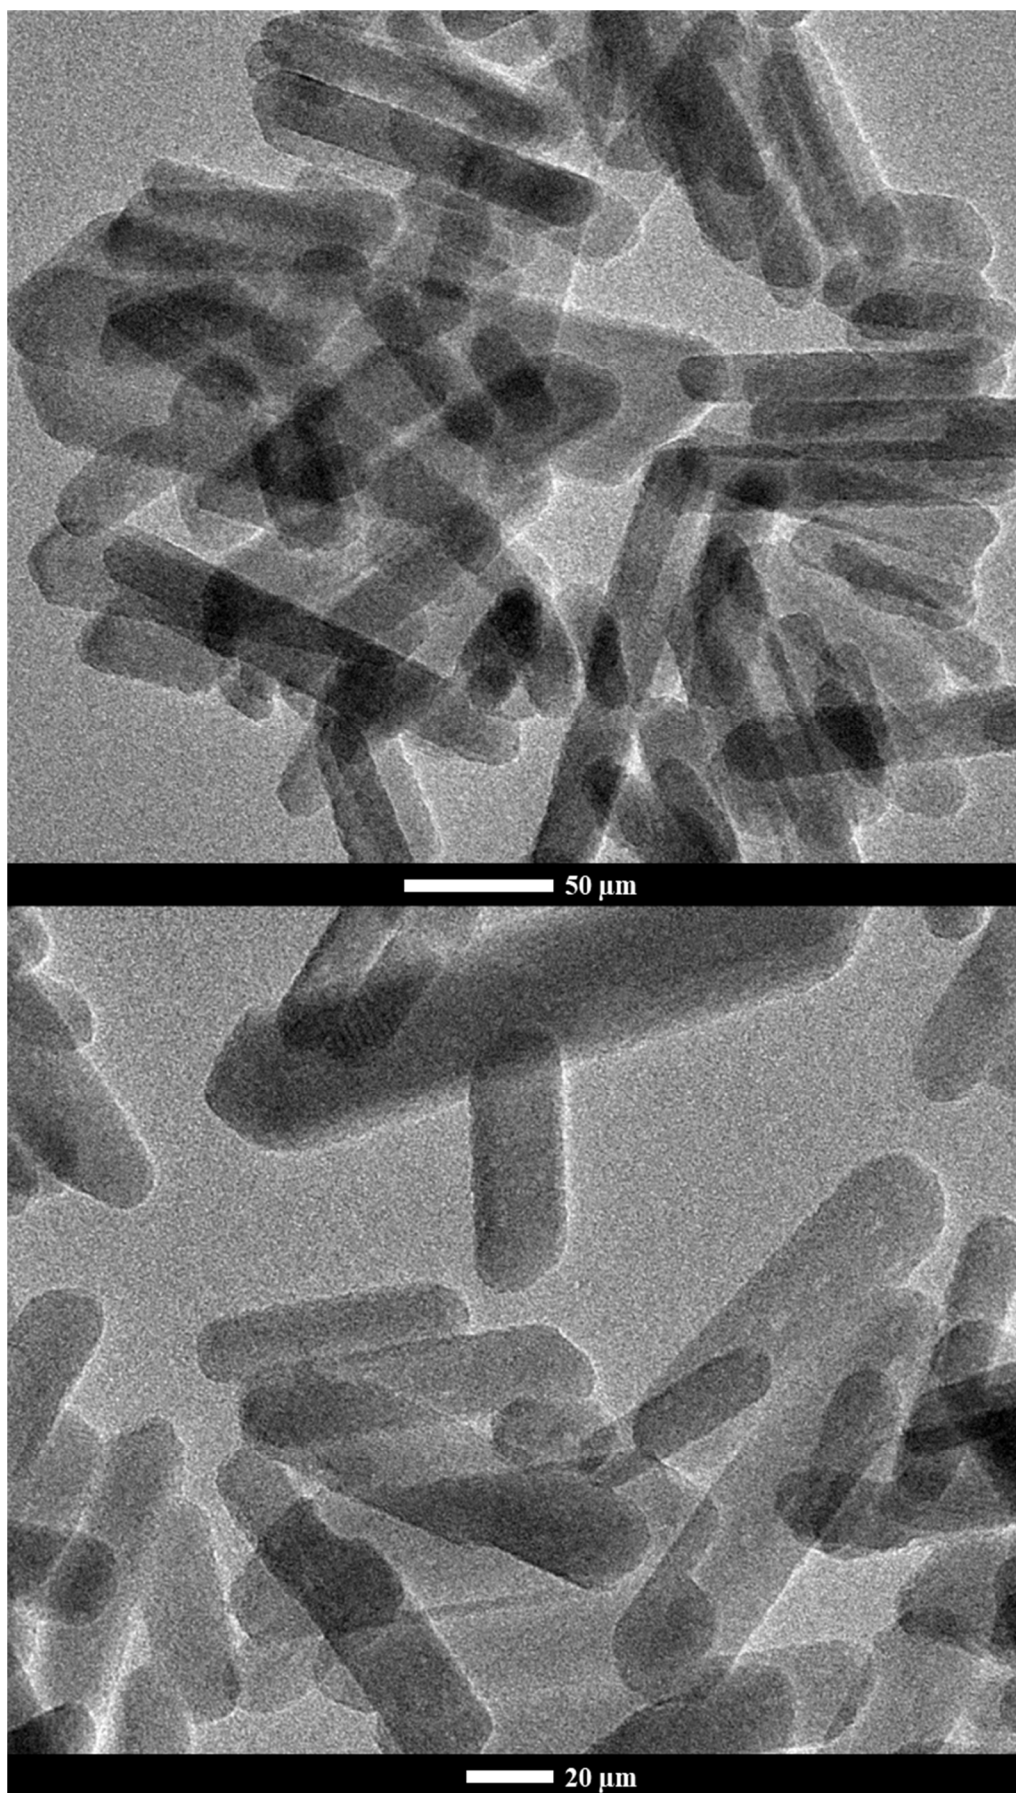

**Figure S2.** TEM micrographs of LAB. HA, nano-crystalline calcium phosphates.

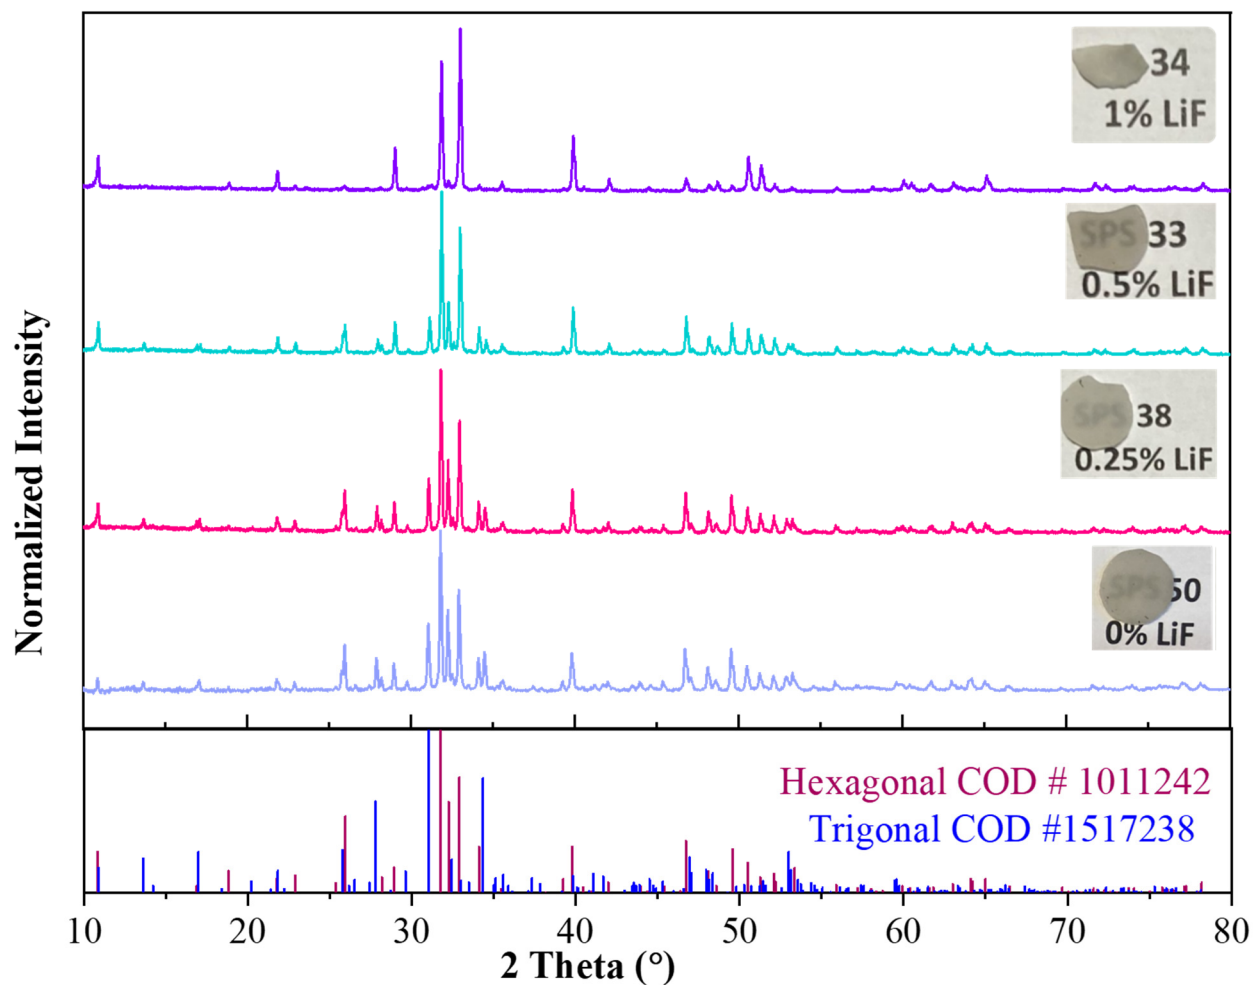

**Figure S3.** Powder XRD patterns of ceramics obtained by SPS at 1050°C from COM. HA nano-powder with different LiF content as well as simulated patterns of hexagonal and trigonal phases of HA.

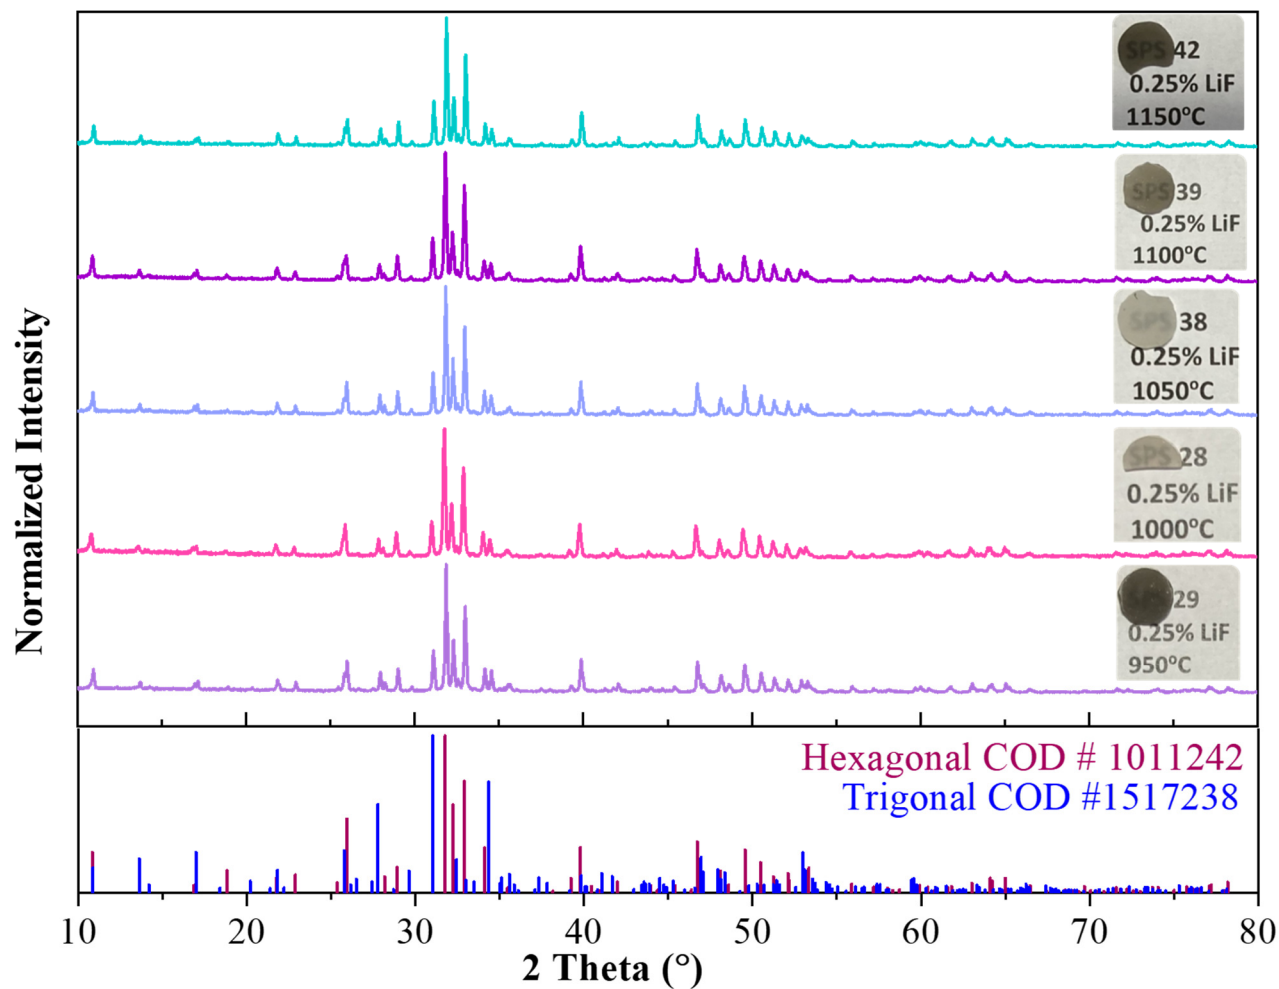

**Figure S4.** Powder XRD patterns of ceramics obtained by SPS at different temperature from COM.HA nano-powder with 0.25% of LiF as well as simulated patterns of hexagonal and trigonal phases of HA.

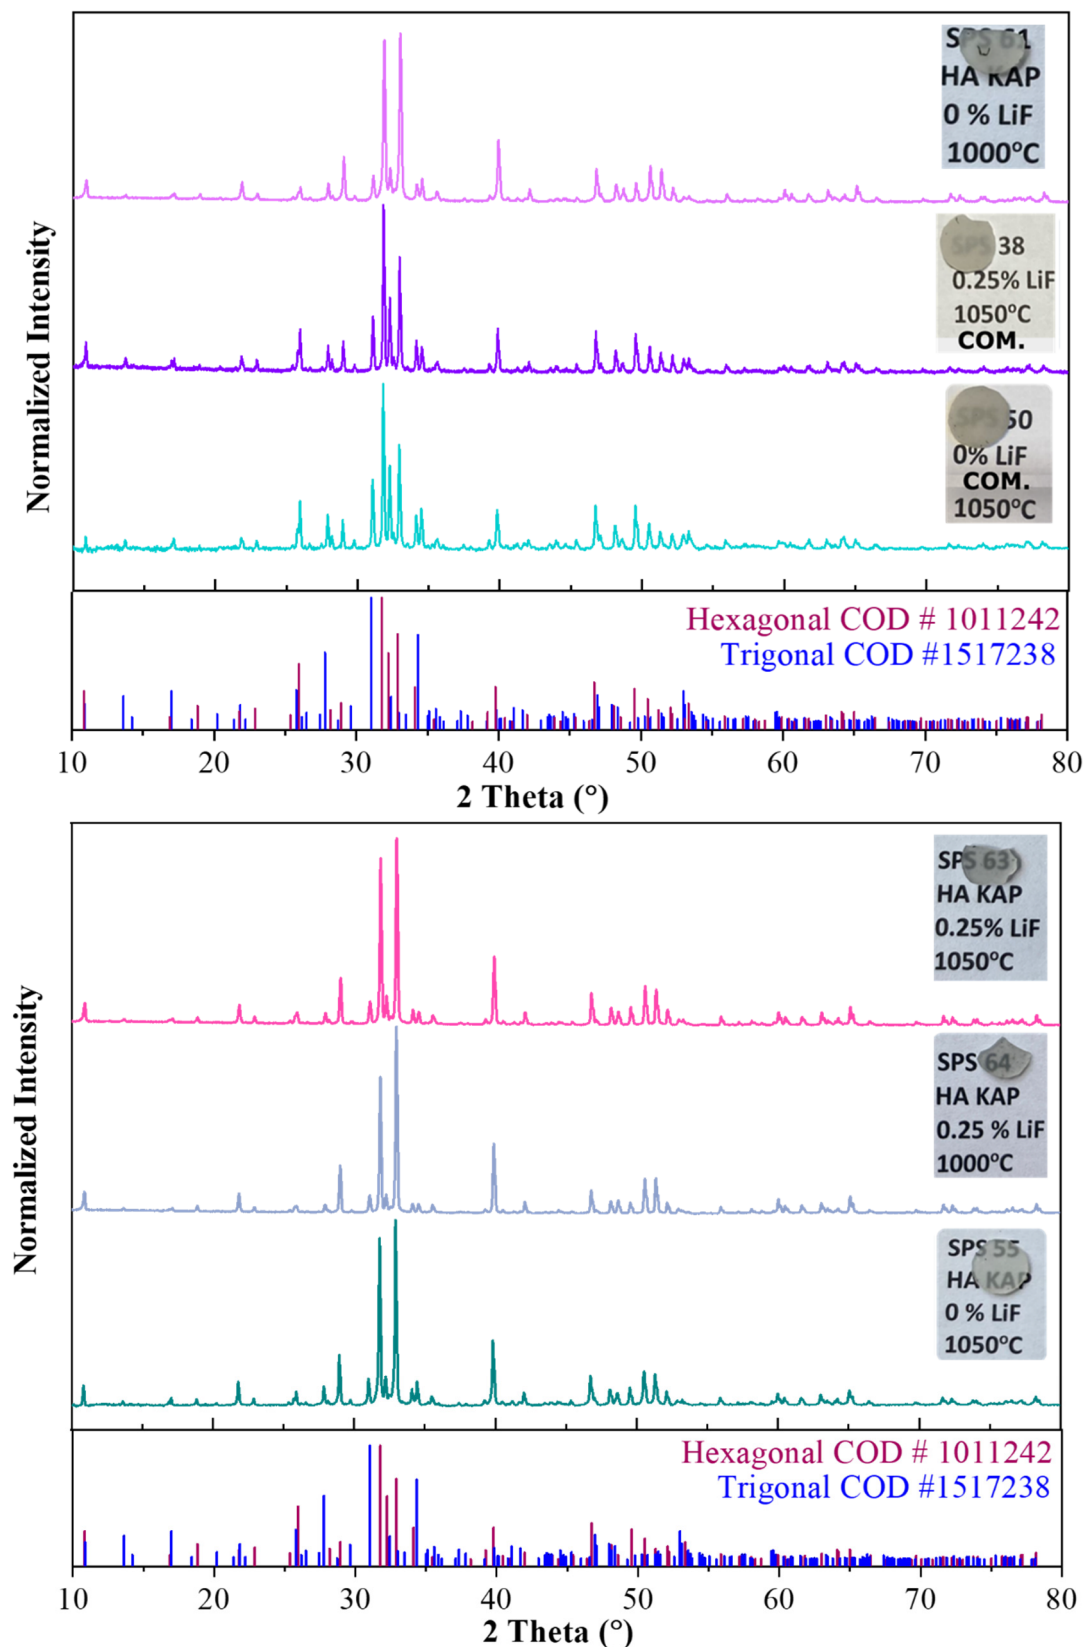

**Figure S5.** Powder XRD patterns of ceramics obtained by SPS from COM. HA and LAB. HA nano-powders with and without the addition of LiF and sintered at 1000°C or 1050°C as well as simulated patterns of hexagonal and trigonal phases of HA.

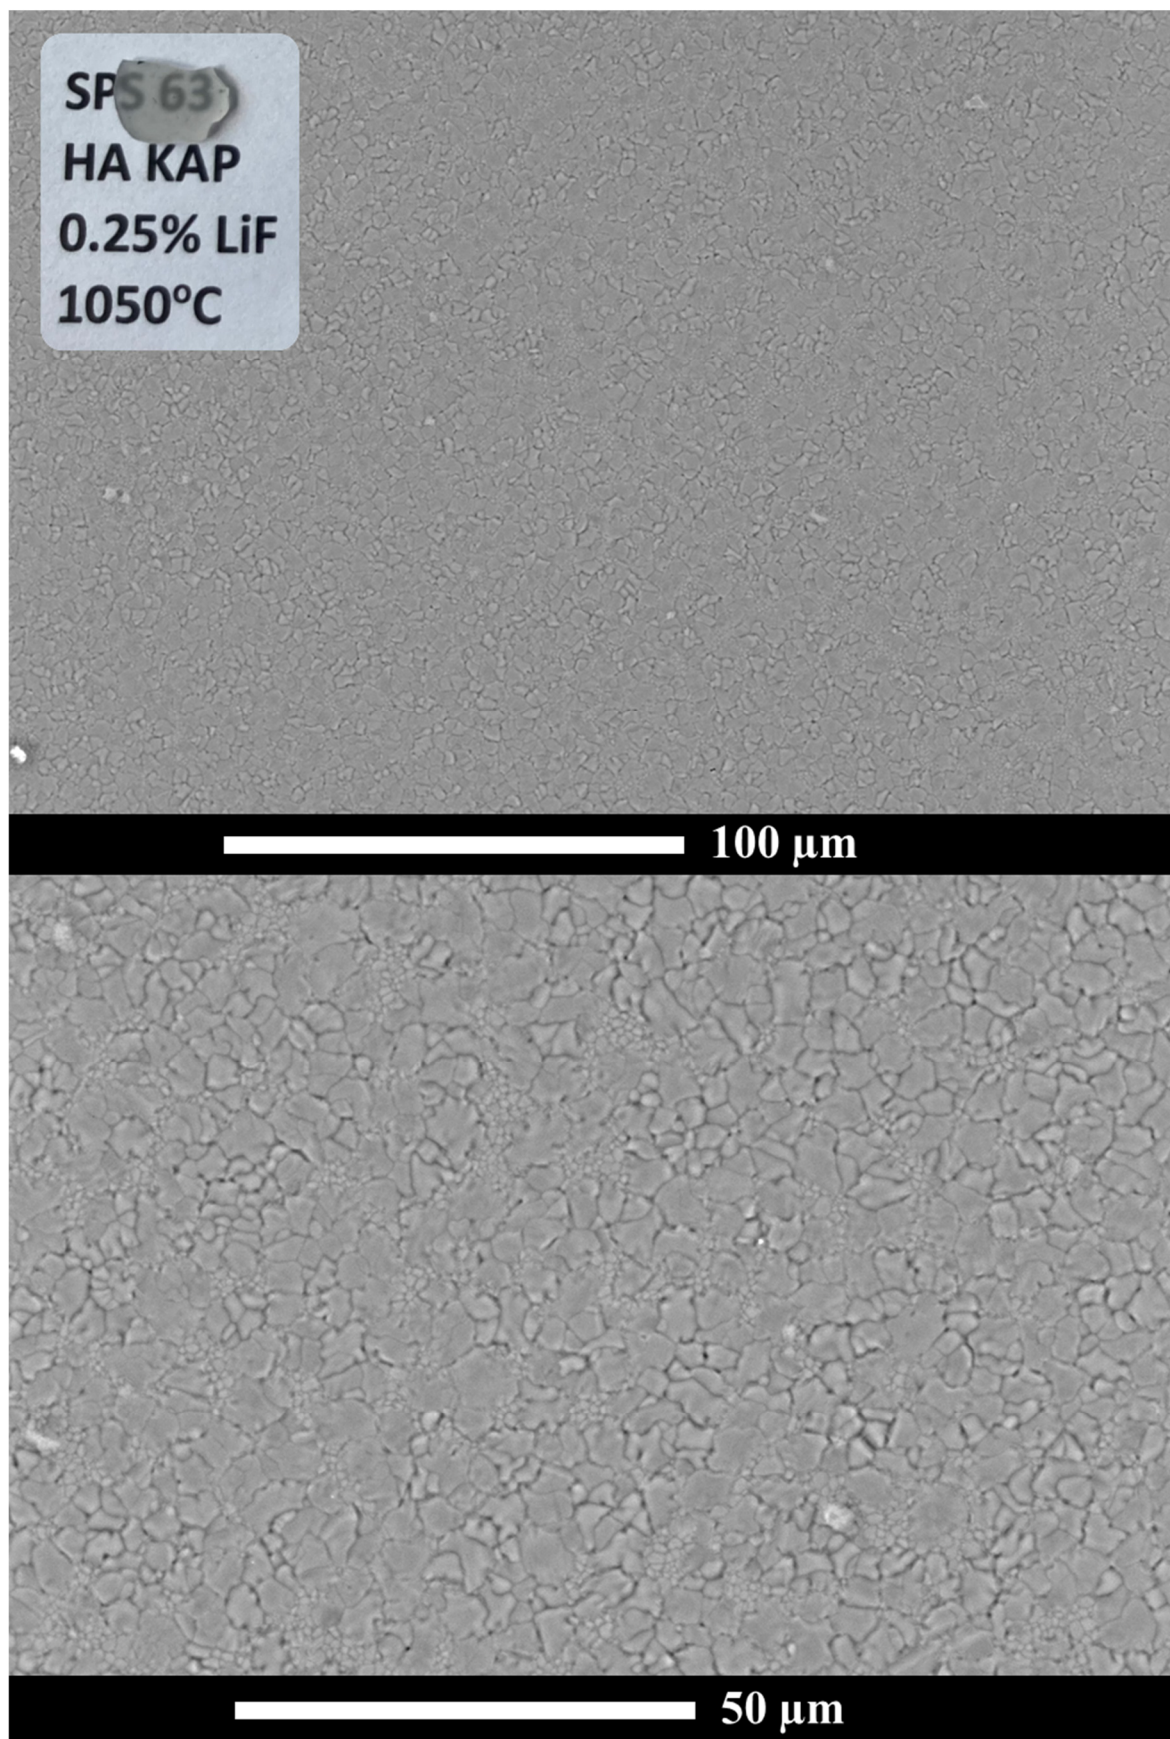

**Figure S6.** SEM micrographs of surfaces of ceramics obtained at 1050°C from COM.HA nano-powder with 0.25% of LiF, which shows the best transparency.
